# Supplementary material for: A genome-wide transgenic RNAi library for conditional gene inactivation in Drosophila
Source: Springer Nature journal article supplement (doi:10.1038/nature05954), 2007-07-01
Supplement: nature05954-s3.pdf [file nature05954-s3.pdf]

**Supplementary Table 3. Quantitative assessment of RNAi efficiency**

| <b>Rank</b> | <b>Gene</b>           | <b>CG No.</b>  | <b>Transformant No.</b> | <b>% control</b> |
|-------------|-----------------------|----------------|-------------------------|------------------|
| 1           | <i>CG10947</i>        | <i>CG10947</i> | 16117                   | 114.08 ± 15.16   |
| 2           | <i>CG1602</i>         | <i>CG1602</i>  | 32659                   | 105.32 ± 20.60   |
| 3           | <i>CG10186</i>        | <i>CG10186</i> | 30768                   | 91.74 ± 12.50    |
| 4           | <i>EG:9D2.4</i>       | <i>CG3795</i>  | 41958                   | 89.32 ± 24.73    |
| 5           | <i>Dap160</i>         | <i>CG1099</i>  | 16157                   | 86.27 ± 14.82    |
| 6           | <i>CG9581</i>         | <i>CG9581</i>  | 39208                   | 83.95 ± 21.81    |
| 7           | <i>CG10946</i>        | <i>CG10946</i> | 8006                    | 81.07 ± 30.43    |
| 8           | <i>E23</i>            | <i>CG3327</i>  | 2620                    | 80.42 ± 15.38    |
| 9           | <i>CG10859</i>        | <i>CG10859</i> | 27322                   | 77.84 ± 14.34    |
| 10          | <i>CG7158</i>         | <i>CG7158</i>  | 35180                   | 77.18 ± 6.87     |
| 11          | <i>l(2)08717</i>      | <i>CG15095</i> | 11117                   | 75.68 ± 1.31     |
| 12          | <i>CG15105</i>        | <i>CG15105</i> | 19290                   | 74.56 ± 22.25    |
| 13          | <i>CG3184</i>         | <i>CG3184</i>  | 25880                   | 72.96 ± 7.04     |
| 14          | <i>EG:86E4.2</i>      | <i>CG3810</i>  | 6922                    | 72.62 ± 33.04    |
| 15          | <i>CG8468</i>         | <i>CG8468</i>  | 6452                    | 71.78 ± 16.63    |
| 16          | <i>alpha-Est6</i>     | <i>CG1108</i>  | 16184                   | 61.95 ± 13.32    |
| 17          | <i>CG10347</i>        | <i>CG10347</i> | 16025                   | 57.45 ± 11.88    |
| 18          | <i>oaf</i>            | <i>CG9884</i>  | 38257                   | 52.08 ± 1.61     |
| 19          | <i>BG:DS04095.1</i>   | <i>CG4891</i>  | 3846                    | 51.86 ± 9.21     |
| 20          | <i>CG13667</i>        | <i>CG13667</i> | 36579                   | 47.85 ± 4.29     |
| 21          | <i>CG7277</i>         | <i>CG7277</i>  | 30691                   | 46.03 ± 10.81    |
| 22          | <i>CG16719</i>        | <i>CG16719</i> | 39934                   | 45.73 ± 7.49     |
| 23          | <i>CG11454</i>        | <i>CG11454</i> | 45118                   | 43.4 ± 6.43      |
| 24          | <i>CG10946</i>        | <i>CG10946</i> | 42252                   | 40.72 ± 7.25     |
| 25          | <i>BcDNA:LD28247</i>  | <i>CG2061</i>  | 44186                   | 37.69 ± 3.00     |
| 26          | <i>Cyp4d20</i>        | <i>CG16761</i> | 22917                   | 35.08 ± 5.51     |
| 27          | <i>CG1814</i>         | <i>CG1814</i>  | 19096                   | 34.75 ± 11.13    |
| 28          | <i>CG2789</i>         | <i>CG2789</i>  | 2507                    | 34.6 ± 2.48      |
| 29          | <i>CG10137</i>        | <i>CG10137</i> | 38343                   | 33.64 ± 6.04     |
| 30          | <i>Taf60-2</i>        | <i>CG10390</i> | 37563                   | 31.57 ± 9.47     |
| 31          | <i>Sara</i>           | <i>CG15667</i> | 19150                   | 29.06 ± 6.32     |
| 32          | <i>CG2017</i>         | <i>CG2017</i>  | 20780                   | 28.98 ± 9.77     |
| 33          | <i>CG11414</i>        | <i>CG11414</i> | 31494                   | 28.47 ± 2.31     |
| 34          | <i>EG:BACN32G11.3</i> | <i>CG14786</i> | 42899                   | 27.75 ± 6.31     |
| 35          | <i>CG1791</i>         | <i>CG1791</i>  | 14629                   | 27.55 ± 1.56     |
| 36          | <i>mfas</i>           | <i>CG3359</i>  | 37889                   | 25.43 ± 5.32     |
| 37          | <i>BcDNA:GH11112</i>  | <i>CG1927</i>  | 7441                    | 22.75 ± 7.84     |
| 38          | <i>CG11426</i>        | <i>CG11426</i> | 42599                   | 21.9 ± 2.16      |
| 39          | <i>Plap</i>           | <i>CG5105</i>  | 45537                   | 20.46 ± 7.54     |
| 40          | <i>Cyp28d1</i>        | <i>CG10833</i> | 7871                    | 19.51 ± 5.95     |
| 41          | <i>CG17524</i>        | <i>CG17524</i> | 6965                    | 19.26 ± 3.52     |
| 42          | <i>CG7470</i>         | <i>CG7470</i>  | 38955                   | 18.71 ± 2.48     |
| 43          | <i>CG4420</i>         | <i>CG4420</i>  | 40512                   | 18.56 ± 4.00     |
| 44          | <i>CG10916</i>        | <i>CG10916</i> | 31379                   | 15.52 ± 3.66     |
| 45          | <i>CG11210</i>        | <i>CG11210</i> | 7363                    | 15.3 ± 1.05      |
| 46          | <i>Cyp28d1</i>        | <i>CG10833</i> | 7870                    | 15.09 ± 3.78     |
| 47          | <i>CG15012</i>        | <i>CG15012</i> | 9175                    | 14.72 ± 5.18     |

|    |                     |                |       |              |
|----|---------------------|----------------|-------|--------------|
| 48 | <i>tst</i>          | <i>CG10210</i> | 38356 | 13.8 ± 1.63  |
| 49 | <i>CG3036</i>       | <i>CG3036</i>  | 42754 | 12.96 ± 0.39 |
| 50 | <i>CG10737</i>      | <i>CG10737</i> | 8996  | 12.71 ± 0.66 |
| 51 | <i>CG3091</i>       | <i>CG3091</i>  | 24713 | 12.7 ± 2.06  |
| 52 | <i>CG10194</i>      | <i>CG10194</i> | 41170 | 12.31 ± 0.28 |
| 53 | <i>Tsp42Ee</i>      | <i>CG10106</i> | 7933  | 12.3 ± 1.97  |
| 54 | <i>inaD</i>         | <i>CG3504</i>  | 26211 | 11.06 ± 4.55 |
| 55 | <i>CG13603</i>      | <i>CG13603</i> | 6778  | 10.42 ± 0.83 |
| 56 | <i>Spn4</i>         | <i>CG9453</i>  | 40973 | 8.61 ± 2.14  |
| 57 | <i>CG11236</i>      | <i>CG11236</i> | 38459 | 8.37 ± 1.47  |
| 58 | <i>CG10373</i>      | <i>CG10373</i> | 6375  | 7.54 ± 1.05  |
| 59 | <i>Cyp4g15</i>      | <i>CG11715</i> | 8035  | 6.91 ± 0.50  |
| 60 | <i>CG2233</i>       | <i>CG2233</i>  | 14606 | 6.77 ± 1.10  |
| 61 | <i>Fmo-2</i>        | <i>CG3174</i>  | 42829 | 6.44 ± 0.25  |
| 62 | <i>BEST:GH12489</i> | <i>CG11534</i> | 16215 | 5.89 ± 1.95  |
| 63 | <i>CG3415</i>       | <i>CG3415</i>  | 34614 | 5.17 ± 0.65  |
| 64 | <i>sut2</i>         | <i>CG17975</i> | 28206 | 4.87 ± 0.37  |
